# Supplementary material
Source: PubMed Central journal article supplement (PMC4783268)

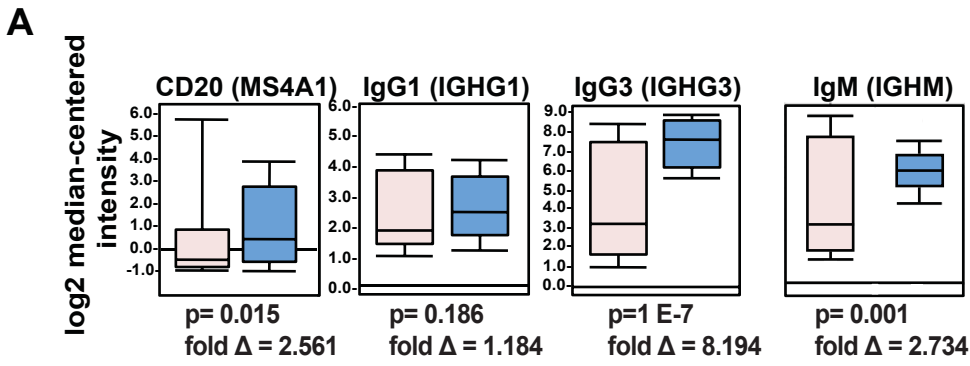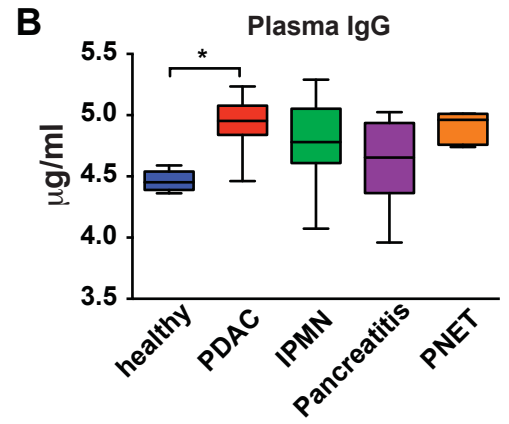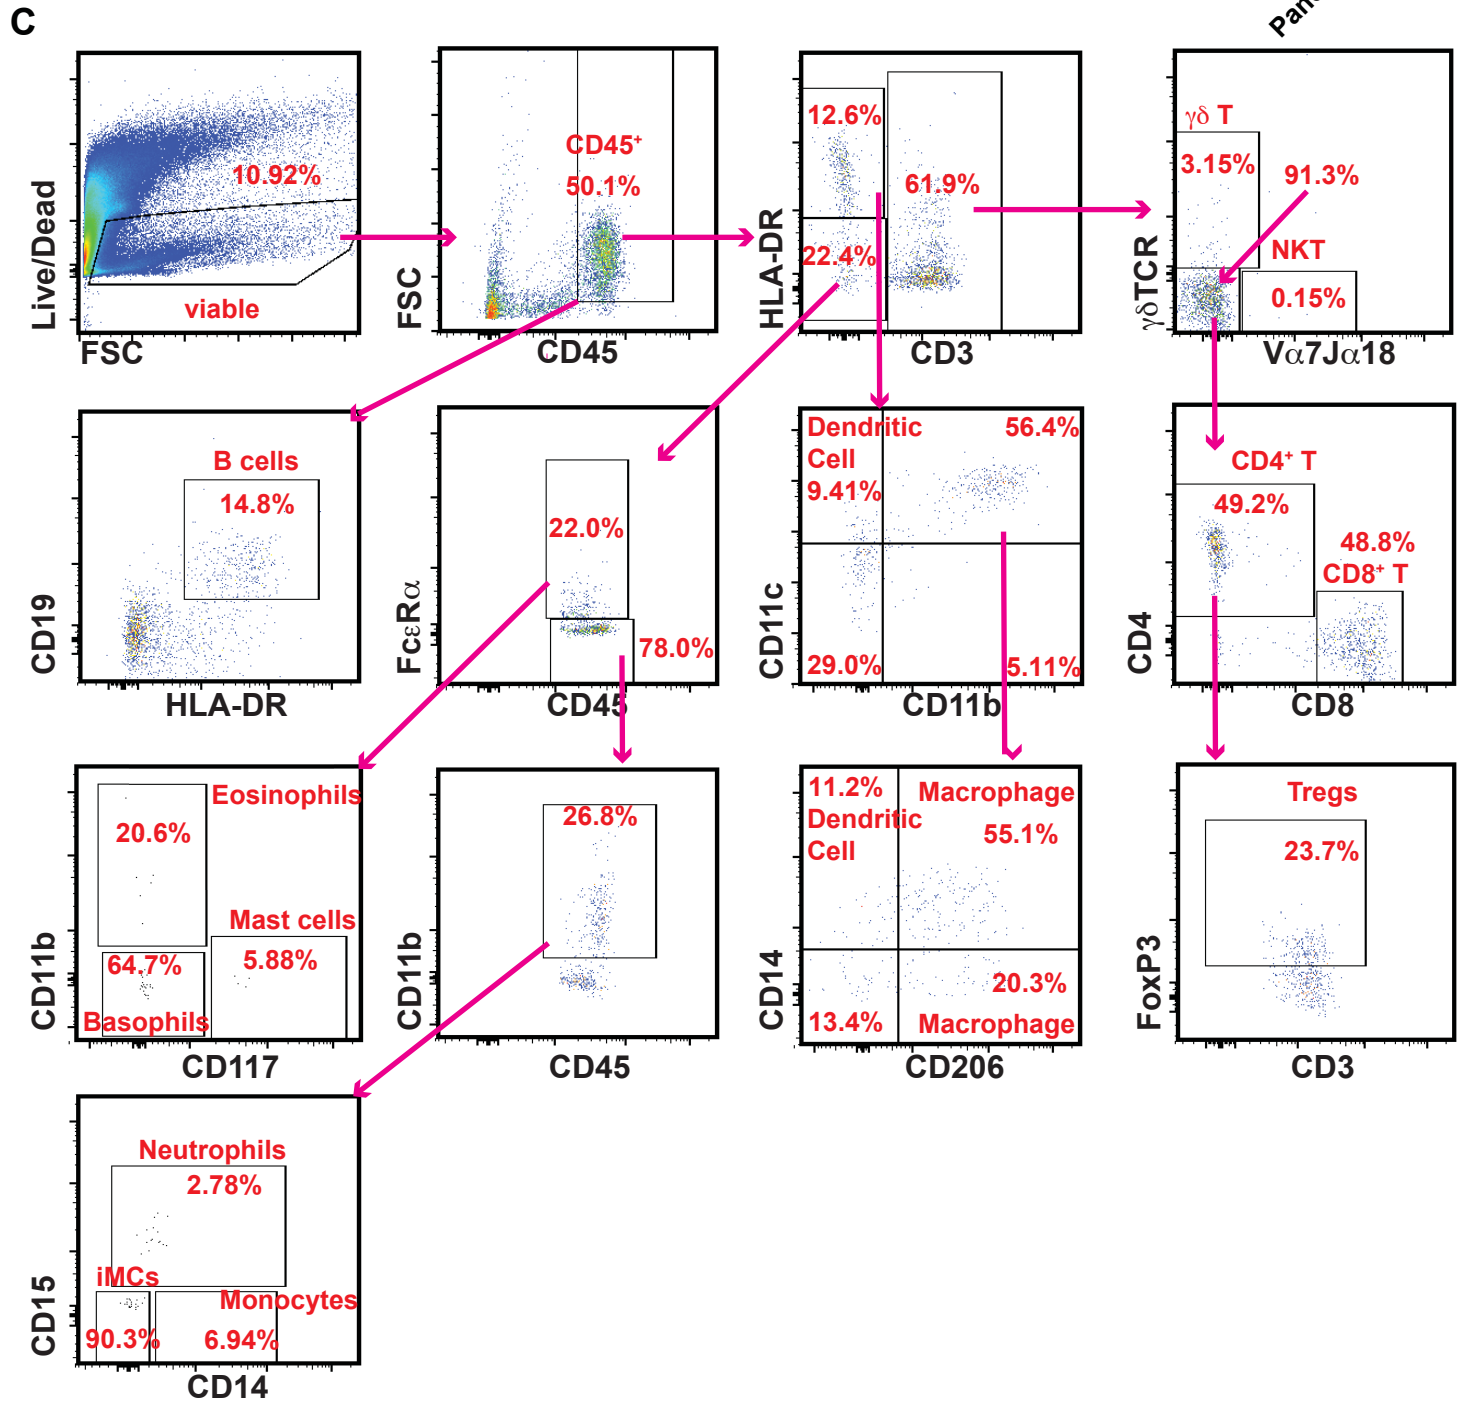

D

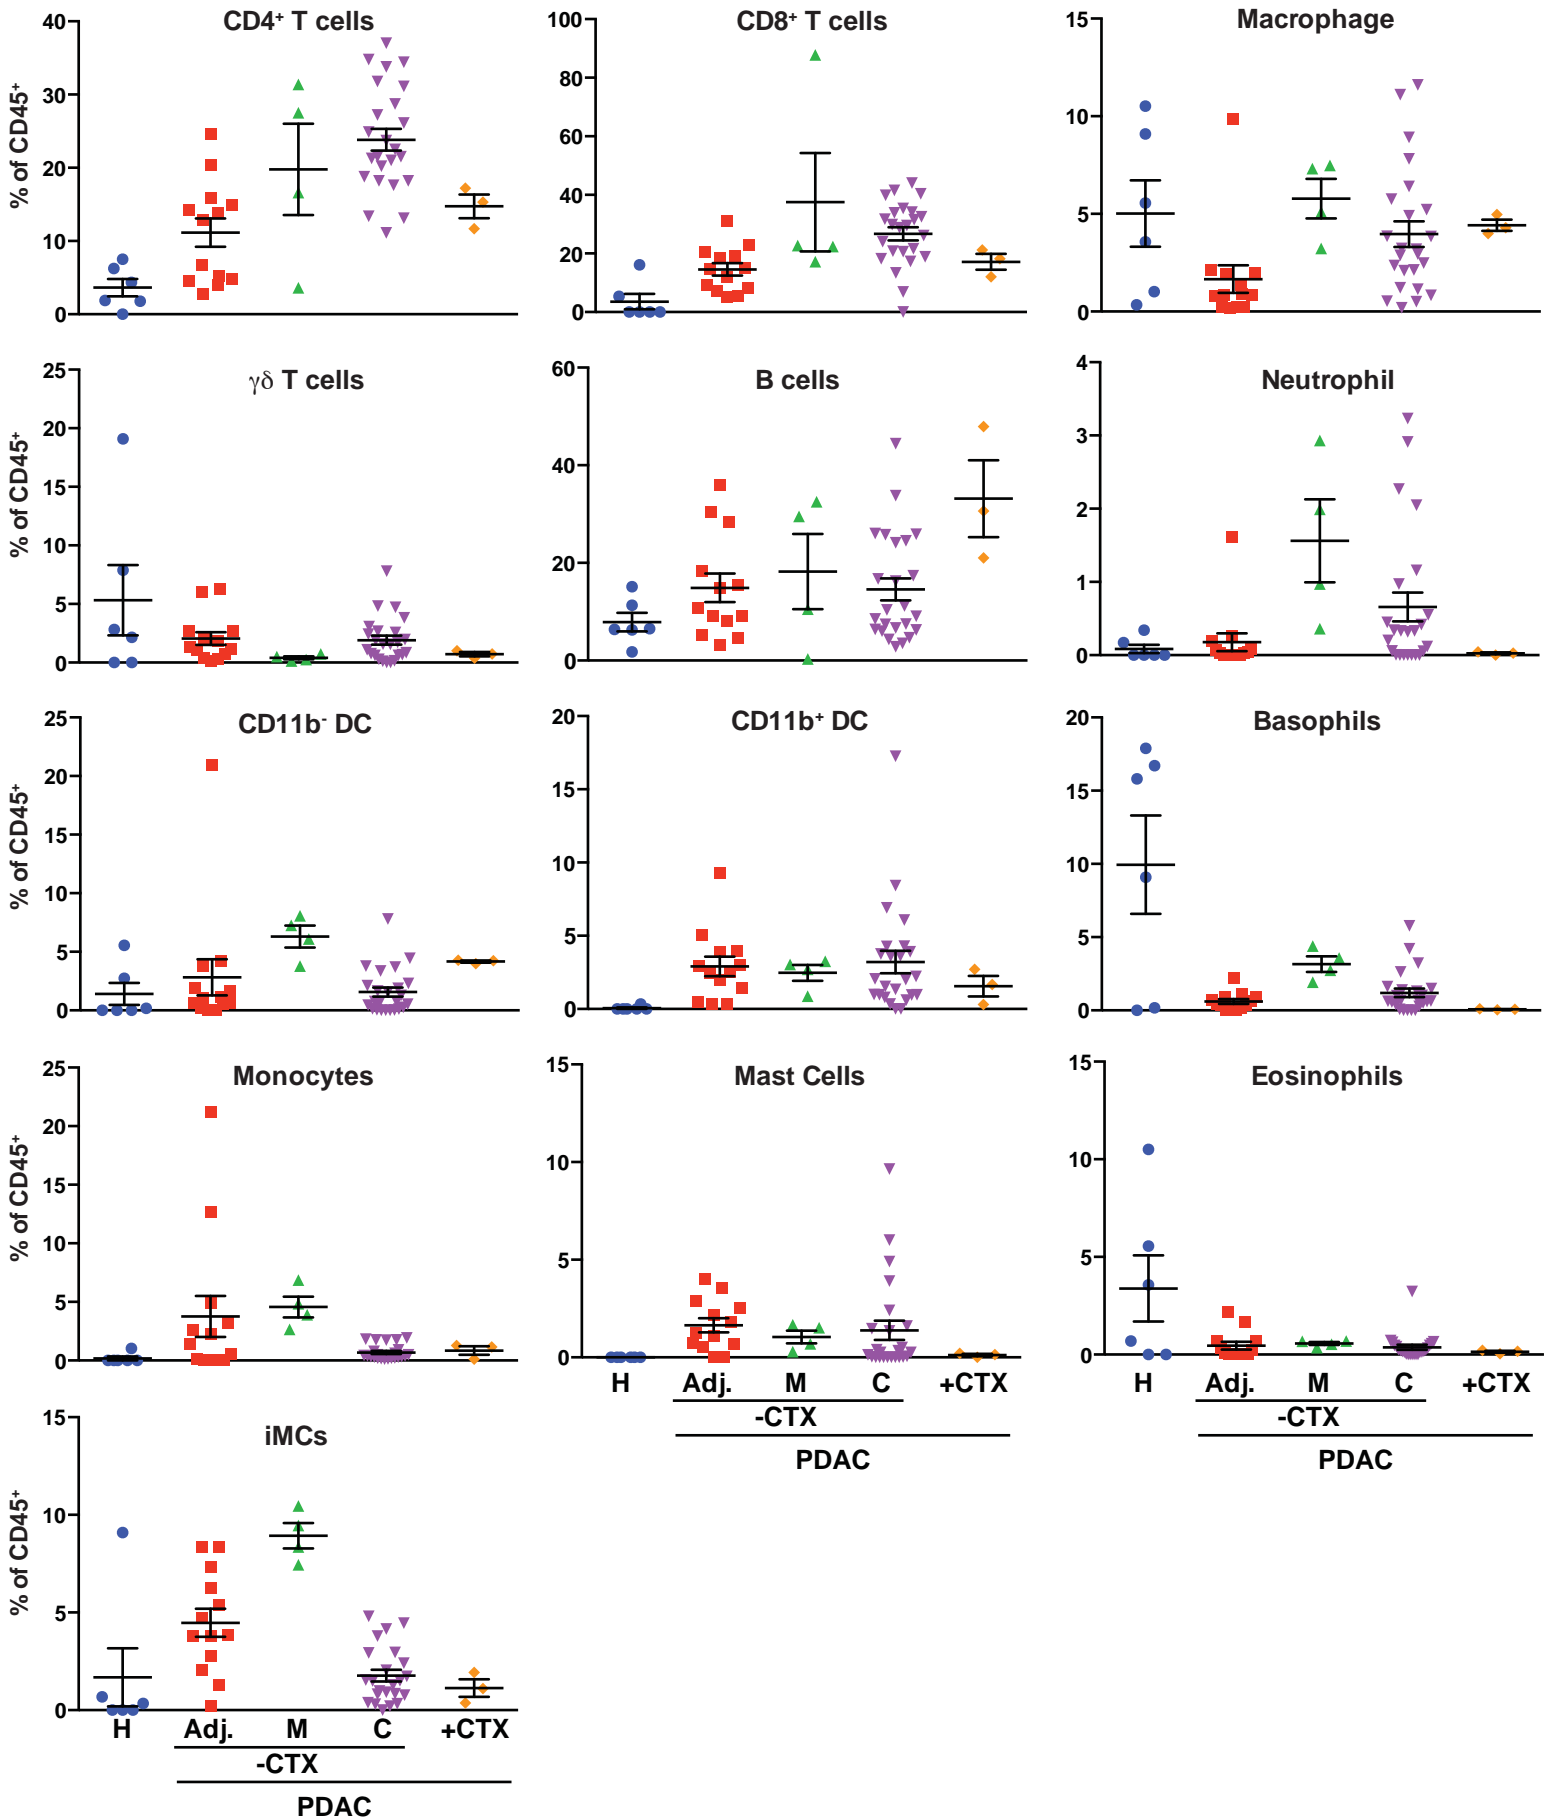

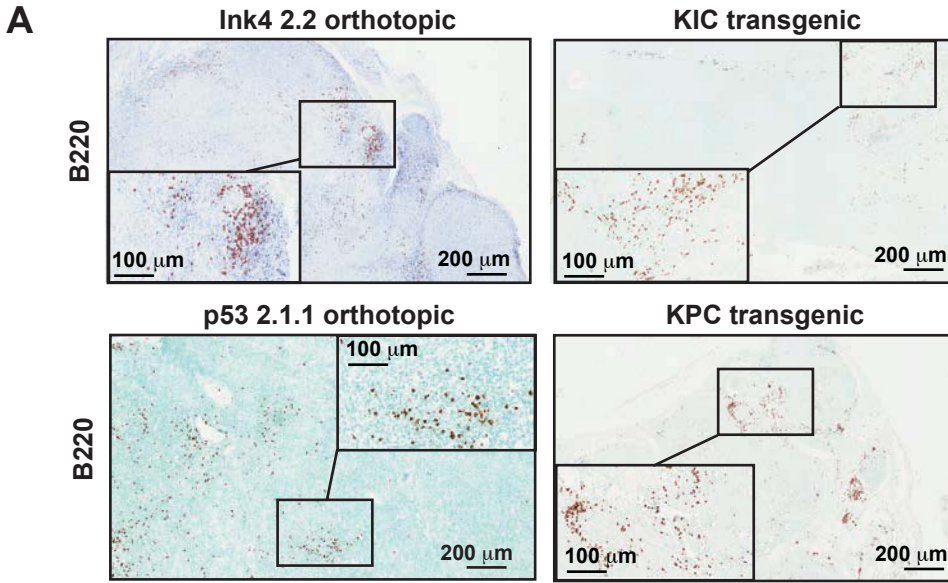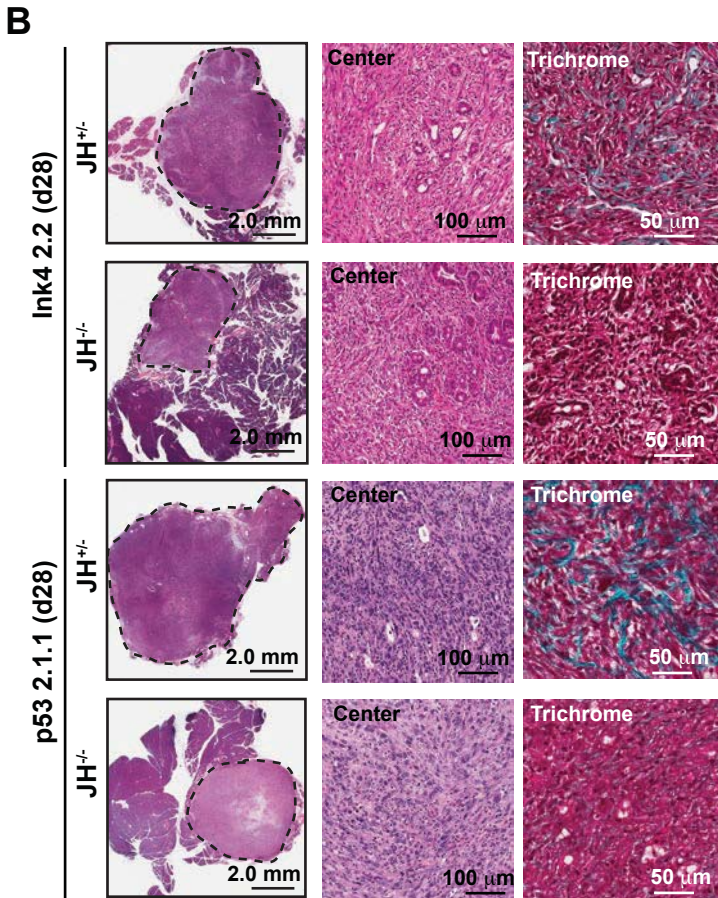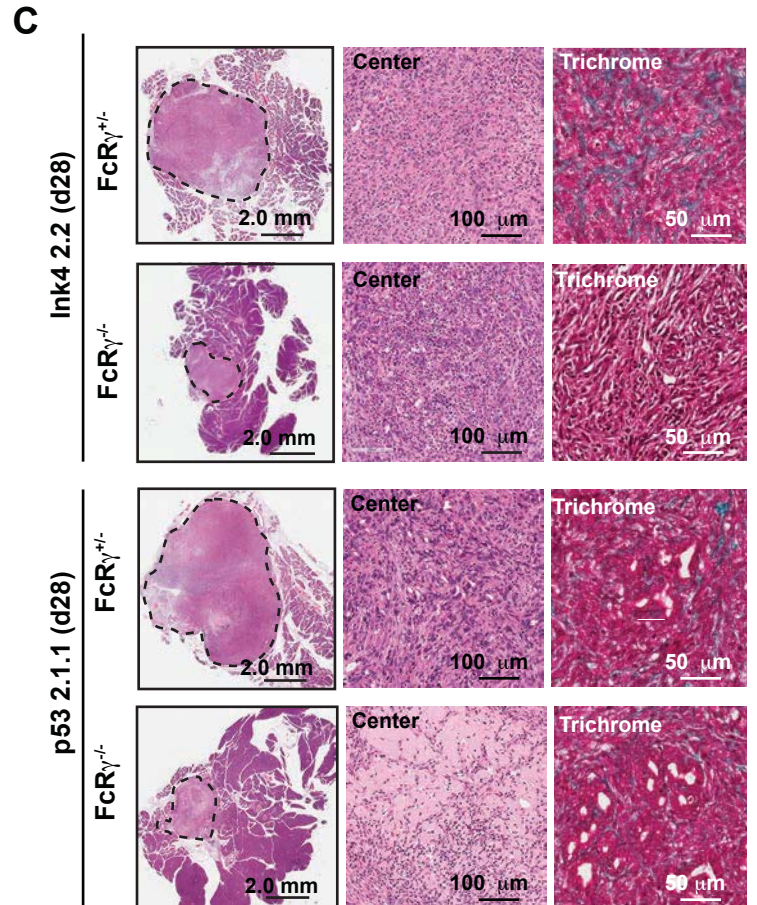

D

Supplementary Fig. S2D-E

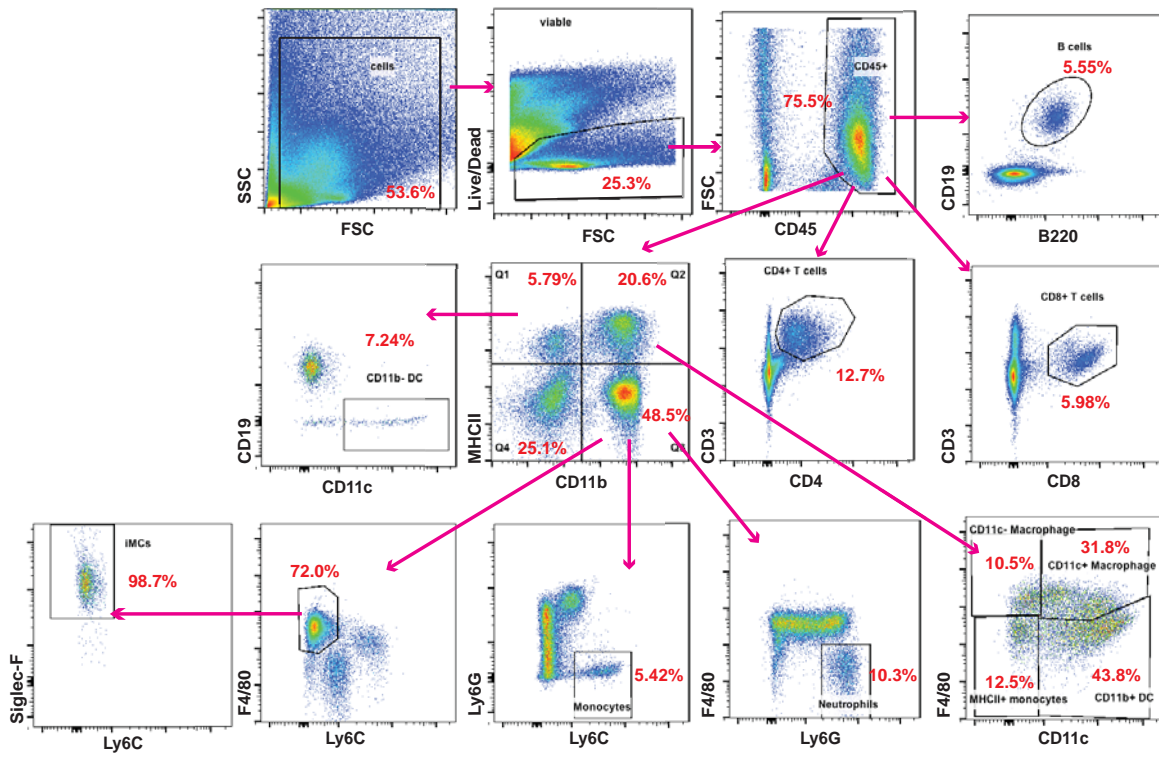

E

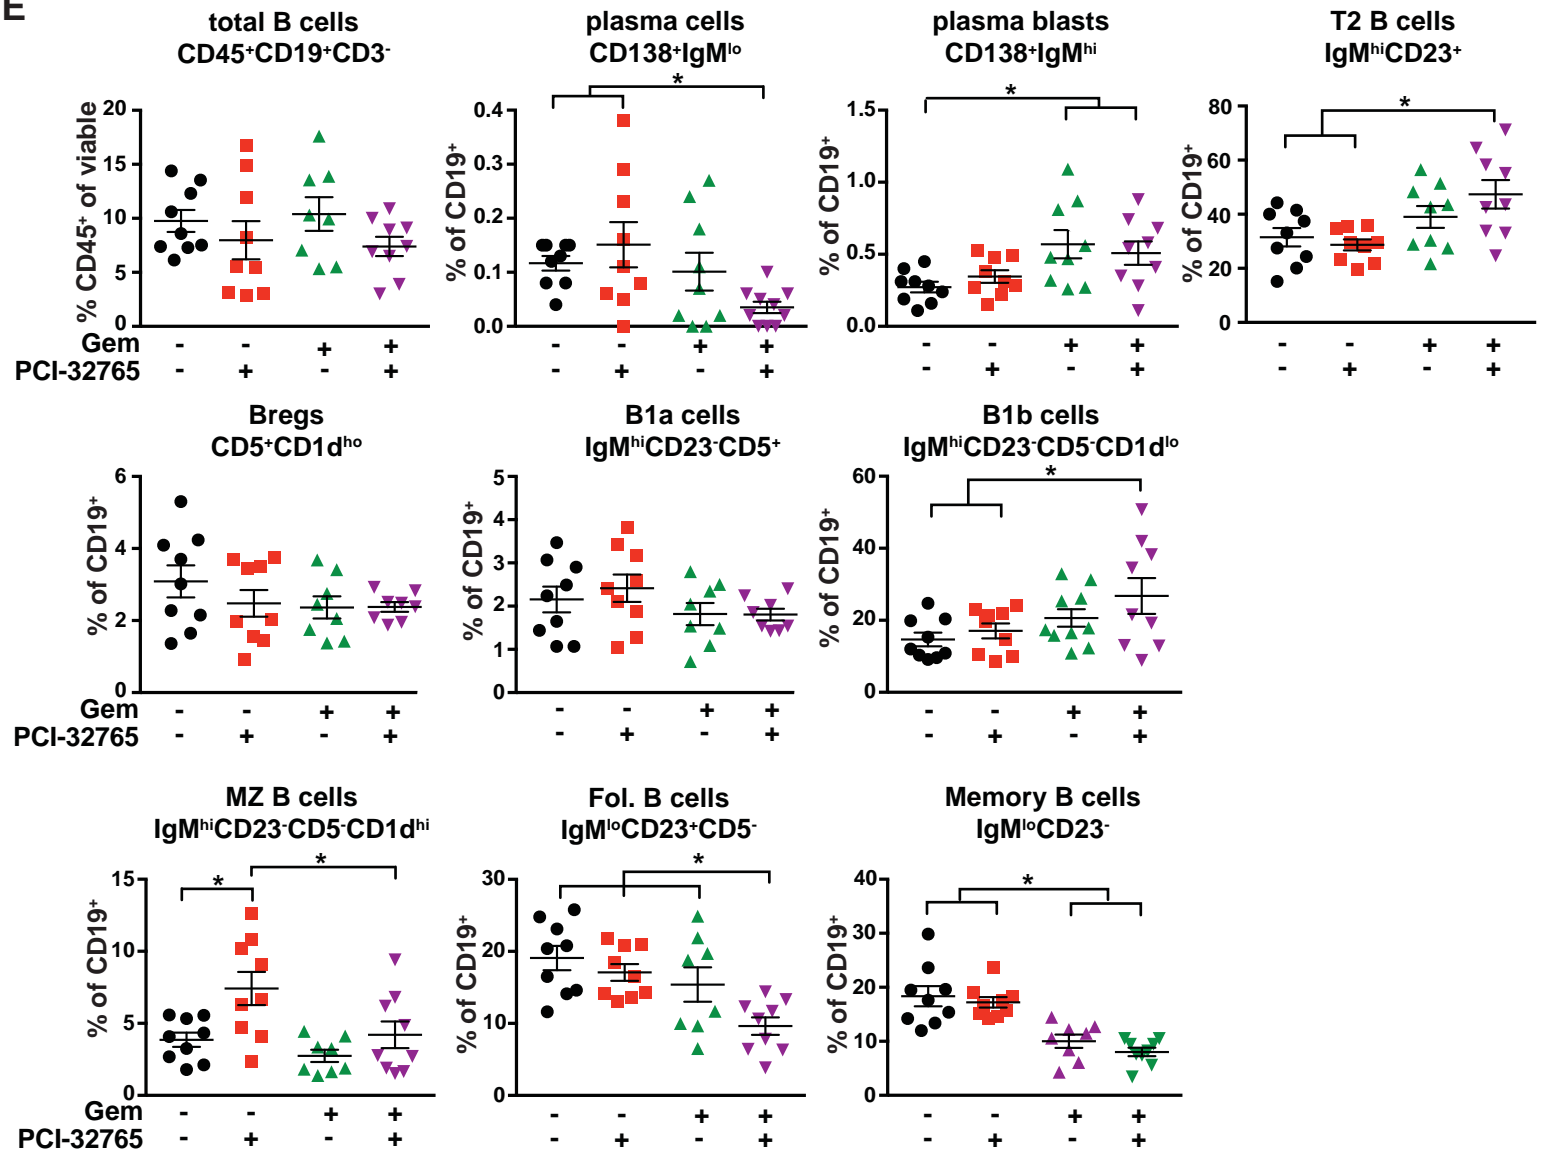

F

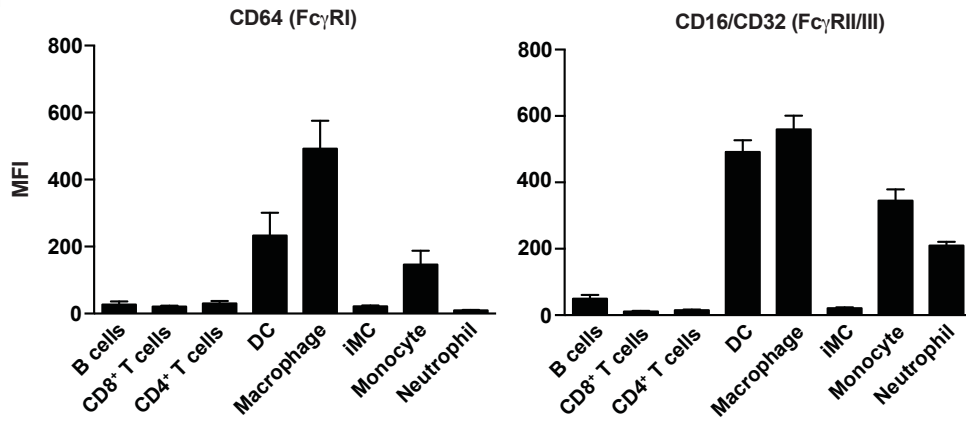

G

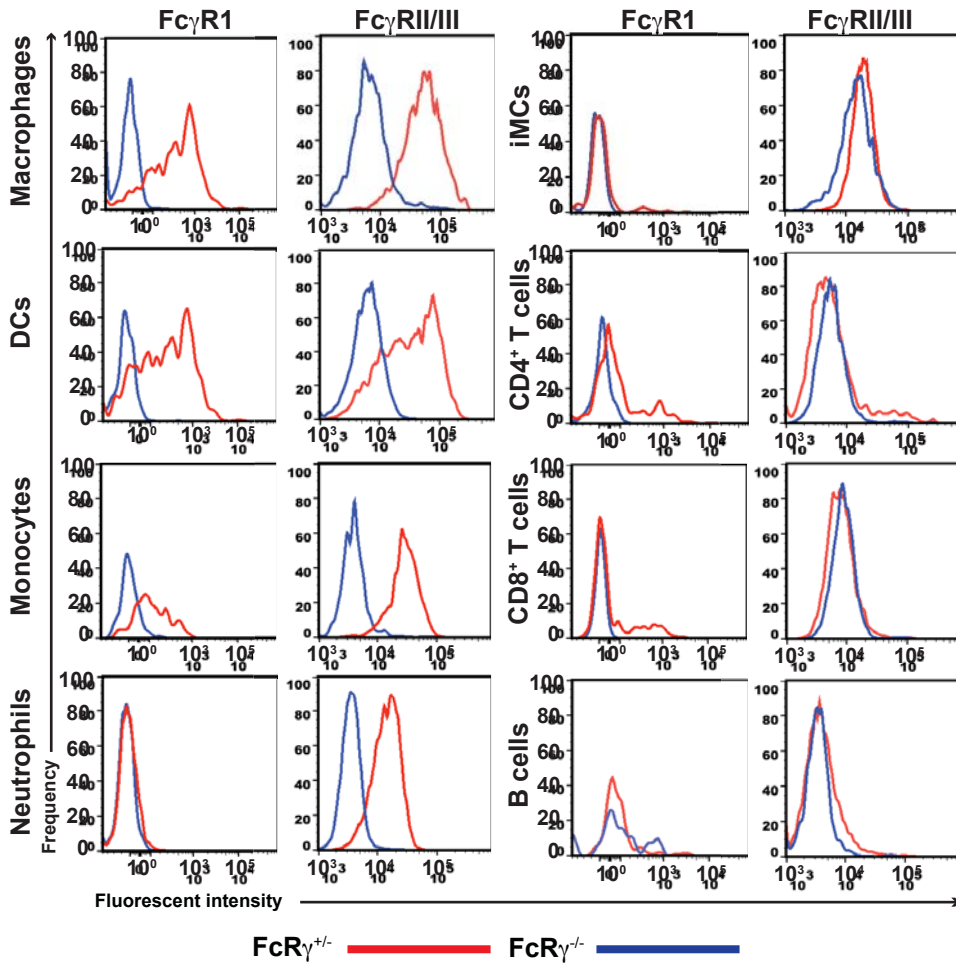

**A**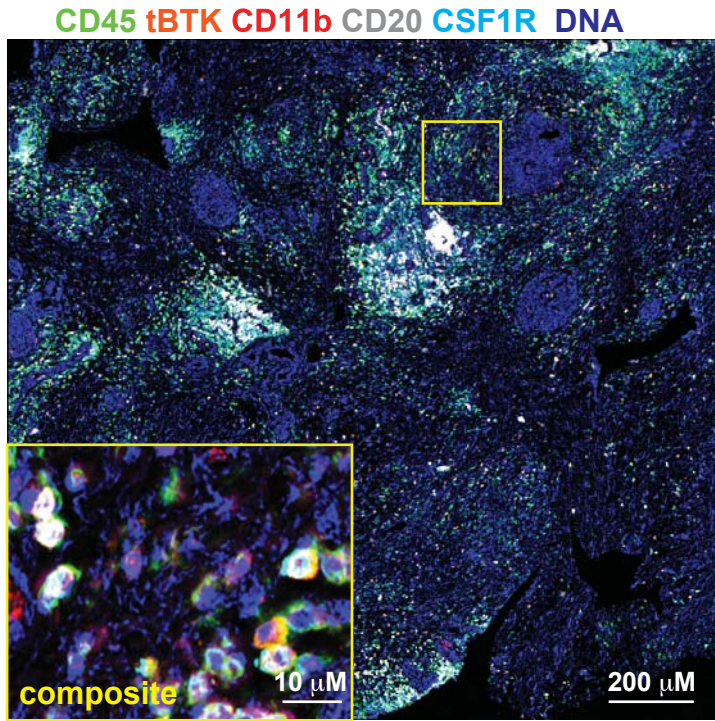**B**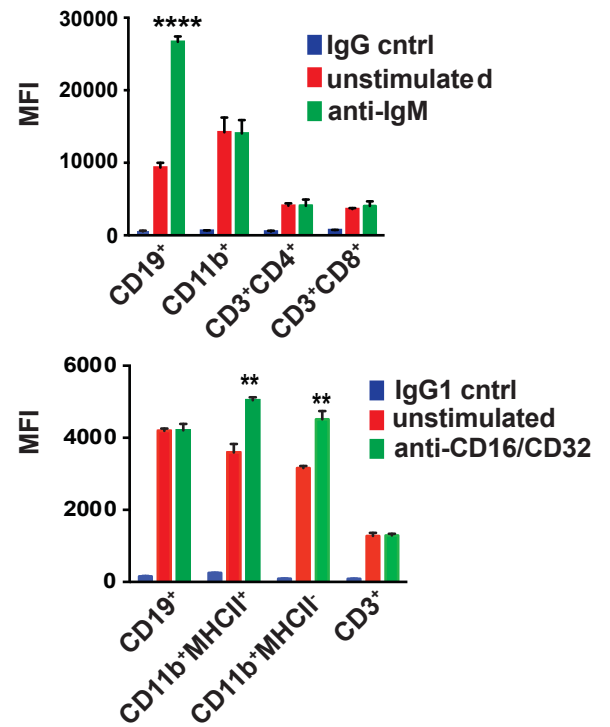**C**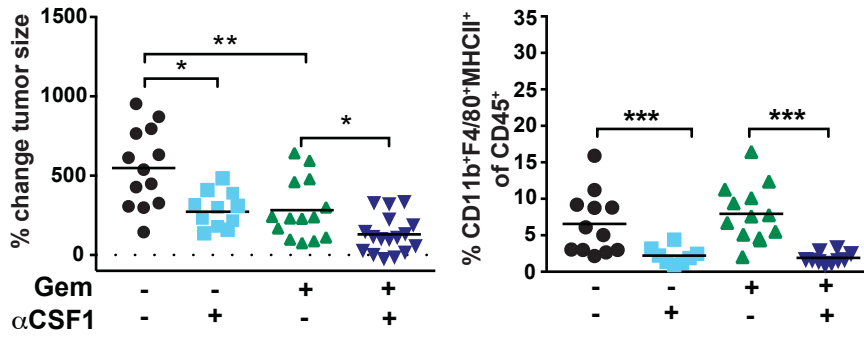**D**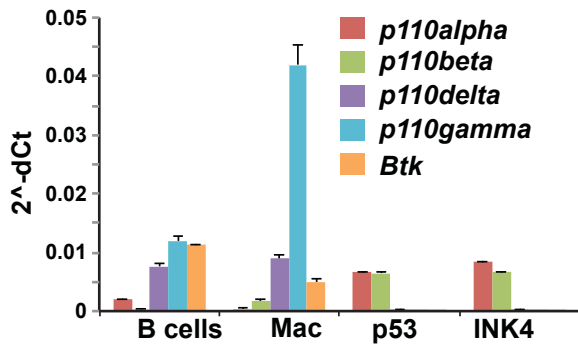

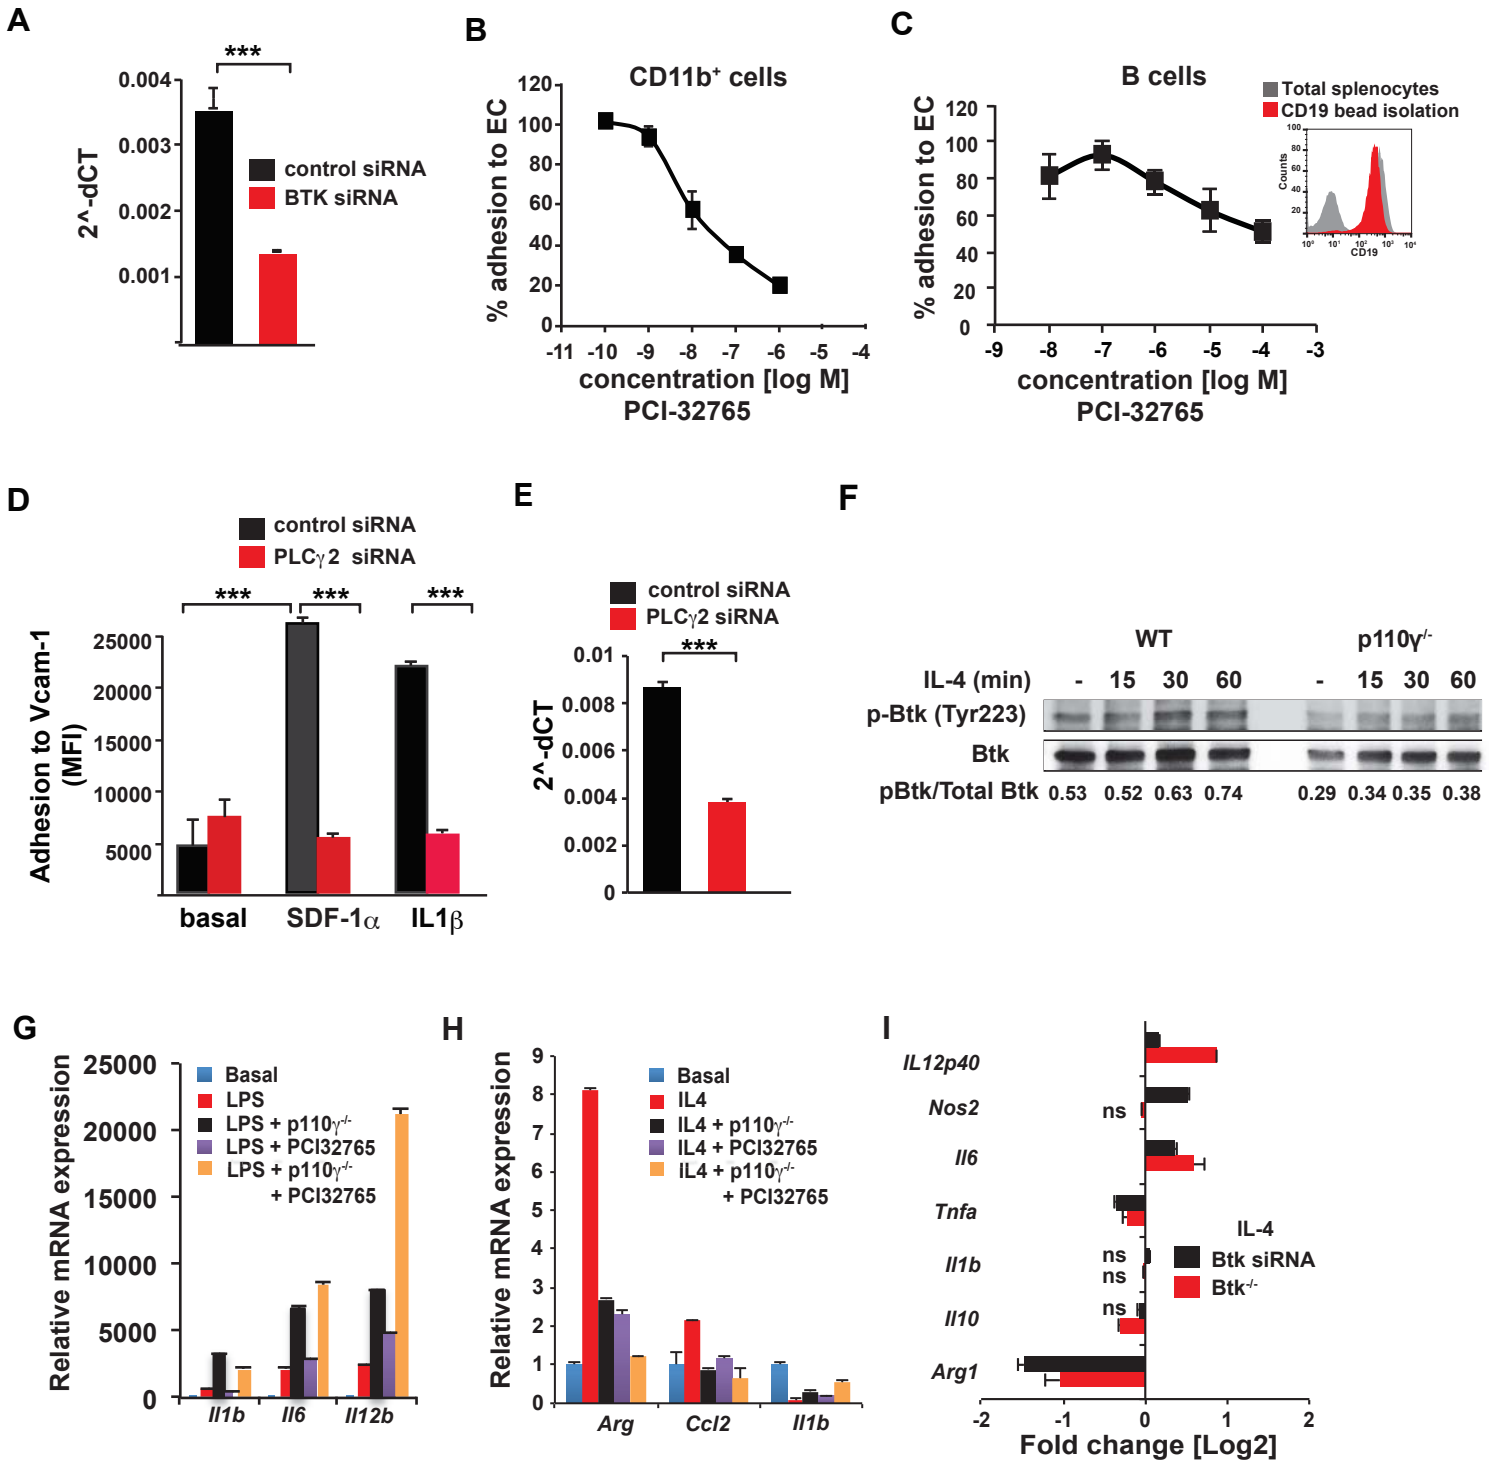

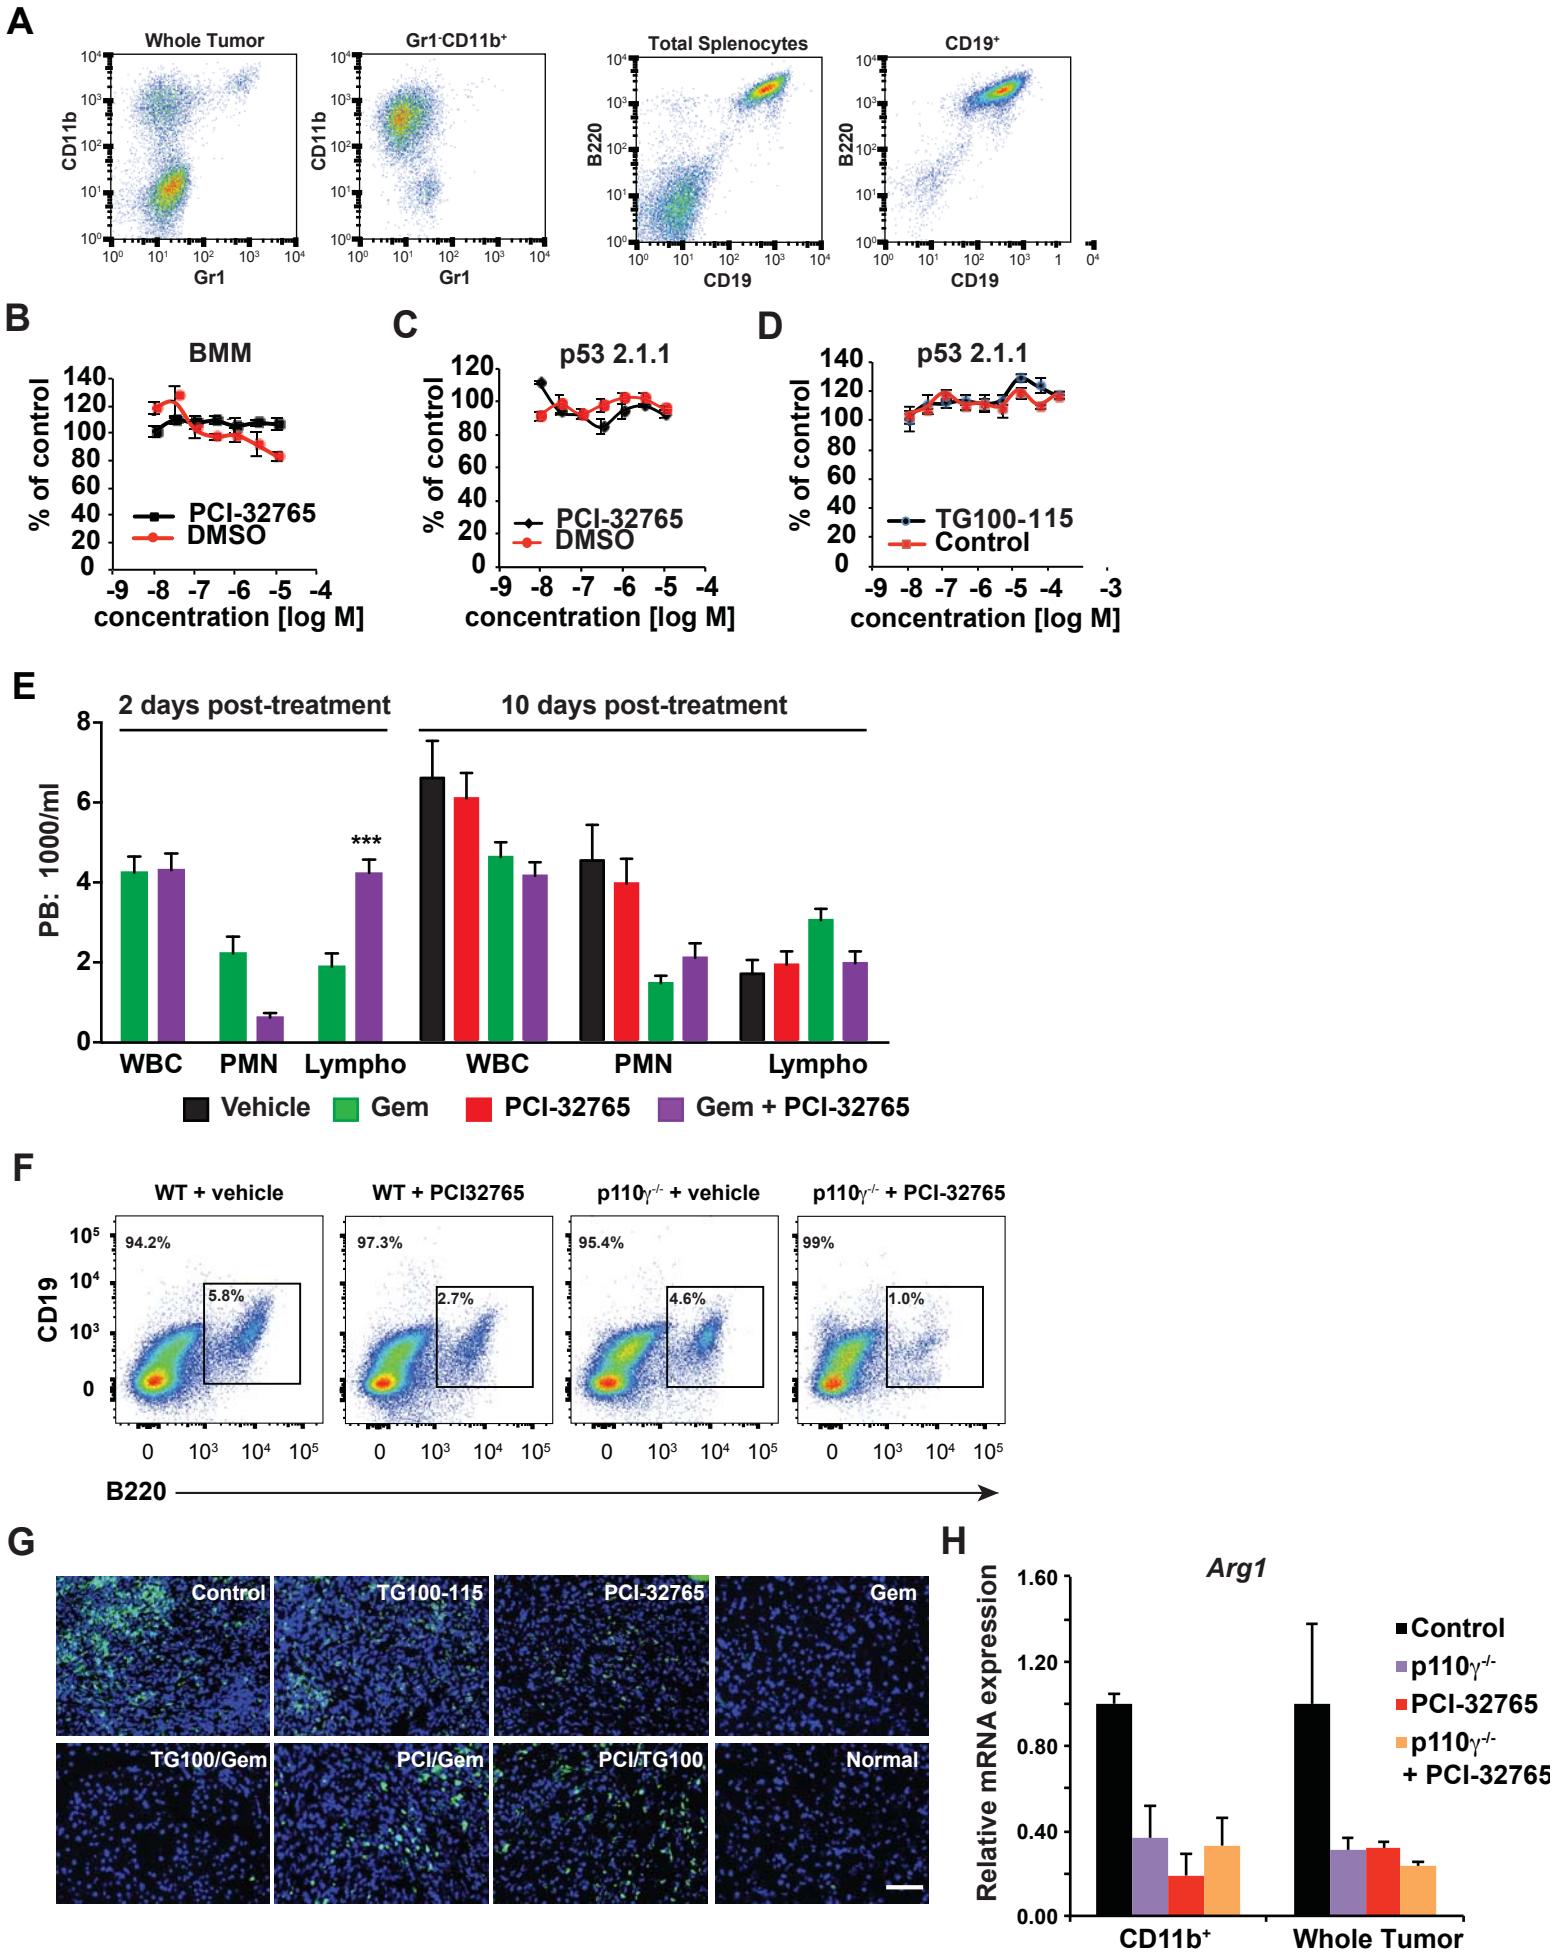



**A**

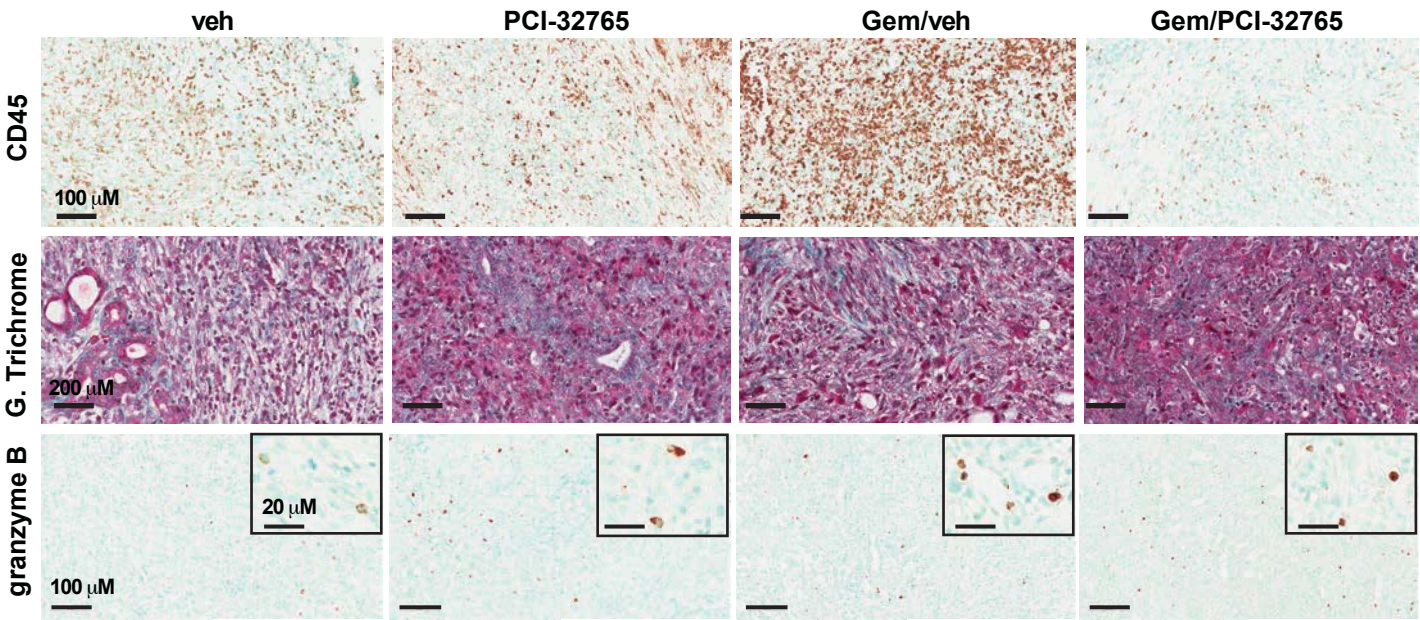

**B**

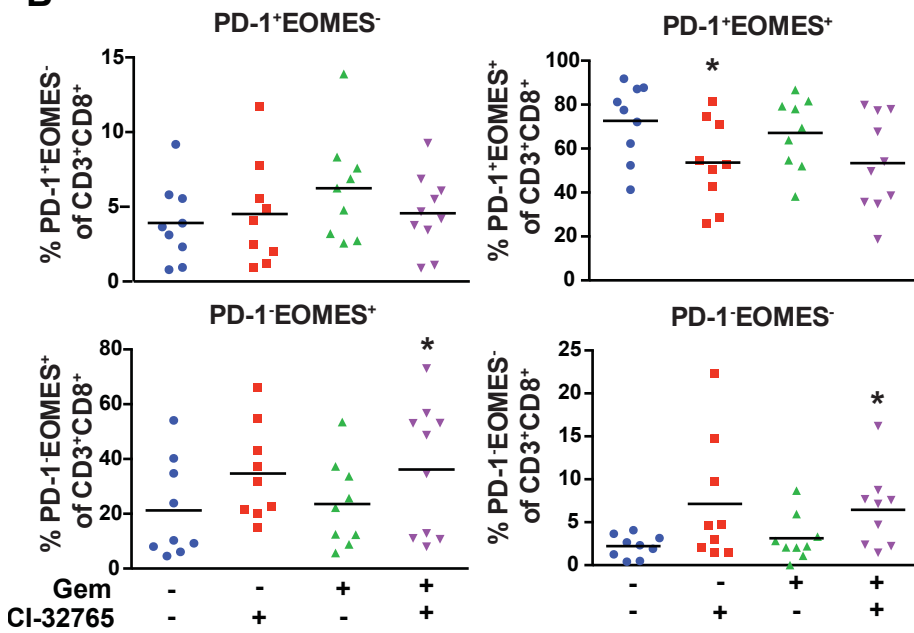

**C**

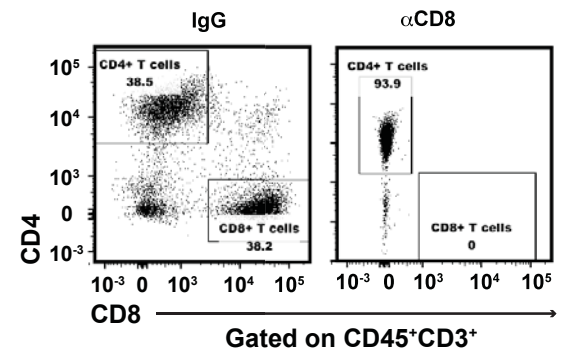

**D**

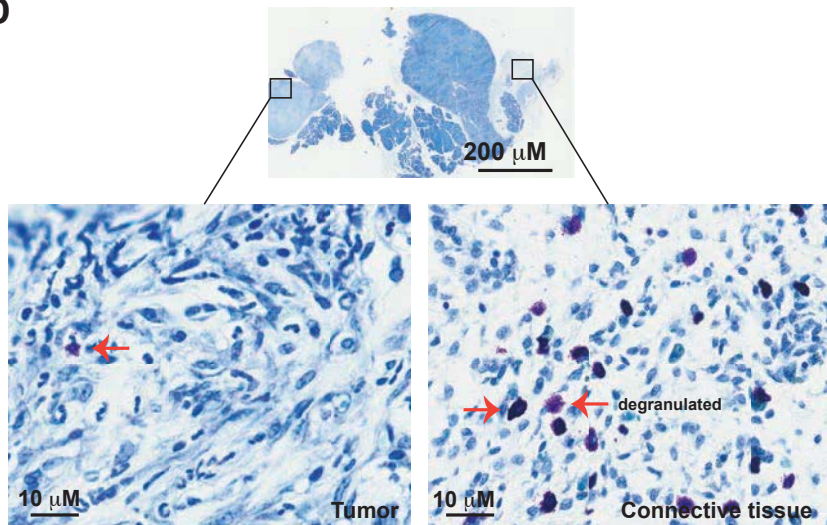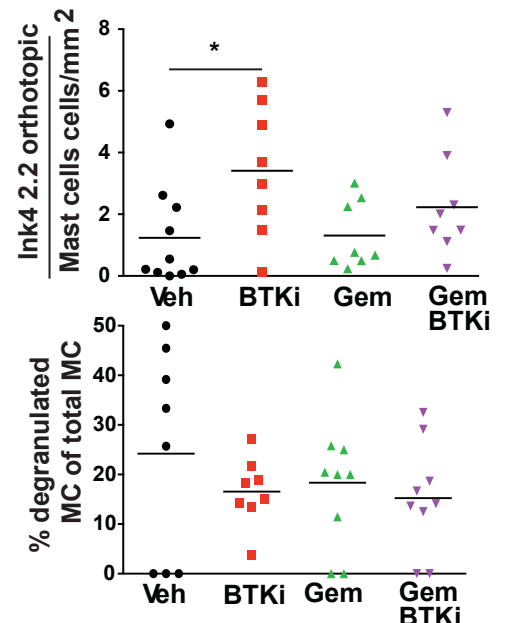

Supplement: NIHMS748240-supplement-2.pdf [file NIHMS748240-supplement-2.pdf]
